# Supplementary material
Source: MDPI journal article supplement (https://www.mdpi.com/2071-1050/10/12/4545)
Supplement: s1 [file s1]

# The Role of the Eco-Industrial Park (EIP) at the National Economy: An Input-Output Analysis on Korea

Hyeong-Woo Kim <sup>1</sup>, Liang Dong <sup>2</sup>, Seok Jung <sup>3</sup> and Hung-Suck Park <sup>4,\*</sup>

**Table S1.** Summary of commercialized projects in the National EIP program of Korea.a

| Priority | Ranking | Name of representative product and service technologies                                         |
|----------|---------|-------------------------------------------------------------------------------------------------|
| 1st      | 1       | Energy optimization using heat of incineration and process                                      |
|          | 2       | Recovery of valuable metals from process wastewater                                             |
|          | 3       | Recycling technology for non-ferrous metal scrap                                                |
|          | 4       | Solid fuel technology using waste wood                                                          |
|          | 5       | Recycling technology of waste acid, alkali, and organic solvents                                |
|          | 6       | Extraction of waste synthetic resin into feedstock                                              |
|          | 7       | Extraction of waste synthetic resin into raw material                                           |
|          | 8       | Alternative fuel production using oil mist recovery and waste oil                               |
|          | 9       | Fertilizer production using by-products of fish and meat processing                             |
|          | 10      | Construction material production using slag and ash                                             |
| 2nd      | 11      | Recovery of valuable metals from process wastewater and sludge                                  |
|          | 12      | Application and extraction of process sludge into raw material                                  |
|          | 13      | Construction material production using inorganic sludge                                         |
|          | 14      | Recovery of valuable metals from waste metals                                                   |
|          | 15      | Industrial water production using sewage treatment plant effluent                               |
|          | 16      | Recycling technology for ferrous metal scrap                                                    |
|          | 17      | Technology of bio-energy production using organic wastewater and by-products                    |
|          | 18      | Extraction of waste synthetic rubber into raw material                                          |
|          | 19      | Recycling technology for organic by-product in ceramic industry                                 |
|          | 20      | Production of Industrial gas using by-product gas                                               |
| 3rd      | 21      | Application and extraction of process sludge into raw material (silicon recovery in wastewater) |
|          | 22      | Solid refuse fuel technology using sludge                                                       |
|          | 23      | Recovery of organic solvent and reclaimed oil from wastewater and sludge                        |
|          | 24      | Production of the chemical raw materials using by-product gas                                   |
|          | 25      | Manufacturing of refractory materials using silicon sludge                                      |
|          | 26      | Regeneration technology of waste adsorbent                                                      |
|          | 27      | Production of microbial preparation using by-products, such as food processes and probiotics    |
|          | 28      | Fertilizer production using waste refractory materials                                          |
|          | 29      | Recovery of valuable metals in waste oil                                                        |
|          | 30      | Production of adsorbent using sludge                                                            |
|          | 31      | Fertilizer production using organic sludge                                                      |
|          | 32      | Fuel production using waste wood                                                                |
|          | 33      | Production of reducing agents for steel making using coke particle                              |
|          | 34      | Application and extraction of ash into rubber product filler                                    |
|          | 35      | Application and extraction of process sludge into floor filler                                  |
|          | 36      | Construction material production using inorganic by-product                                     |
|          | 37      | Hydrotalcite production using fly ash                                                           |

**Table S2.** Match of products and services in the commercialized EIP projects with economic sectors.

|                                                                     |                               | SIC code                                                                                                                                                                                                |              |                                                                                                                            |
|---------------------------------------------------------------------|-------------------------------|---------------------------------------------------------------------------------------------------------------------------------------------------------------------------------------------------------|--------------|----------------------------------------------------------------------------------------------------------------------------|
|                                                                     |                               | 384 sector                                                                                                                                                                                              |              | 30 sector                                                                                                                  |
| Name of Representative Product and service technologies             | code                          | name                                                                                                                                                                                                    | code         | name                                                                                                                       |
| Energy optimization using heat of incineration and process          | 27, 29, 106, 181, 279, 280    | Bituminous coal, LNG, diesel oil, industrial boiler and steam generator, gas, steam and hot water                                                                                                       | 2, 6, 10, 16 | Mined and Quarried Products, Coal and Petroleum Products, Metal Products, Electricity, Gas and Steam                       |
| Recovery of valuable metals from process wastewater                 | 169, 283                      | Copper smelting, refining and alloy product, Treatment of sewage, Waste water and night soil(Industrial)                                                                                                | 9, 17        | Primary Metal Products, Water Supply, Waste and Remediation Service                                                        |
| Recycling technology for non-ferrous metal scrap                    | 170, 171, 173, 285, 286       | Aluminum and lead smelting, refining and alloy product, other non-ferrous metal smelting, refining and alloy product, Waste collection transport and treatment (industrial), resource recycling service | 9, 17        | Primary Metal Products, Water Supply, Waste and Remediation Service                                                        |
| Solid fuel technology using waste wood                              | 27, 106, 285, 286             | Bituminous coal, diesel oil, waste collection transport and treatment (industrial), resource recycling service                                                                                          | 2, 6, 17     | Mined and Quarried Products, Coal and Petroleum Products, Waste and Remediation Service                                    |
| Recycling technology of waste acid, alkali and organic solvent      | 115, 117, 286                 | Other base organic compounds, other inorganic compounds, resource recycling service                                                                                                                     | 7, 17        | Chemical Products, Waste and Remediation Service                                                                           |
| Extraction of waste synthetic resin into feedstock                  | 27, 29, 85, 88, 106, 285, 286 | Bituminous coal, LNG, recycling lumber, other wooden products, diesel oil, waste collection transport and treatment (industrial), resource recycling service                                            | 2, 5, 6, 17  | Mined and Quarried Products, Wood and Paper Products, Printing, Coal and Petroleum Products, Waste and Remediation Service |
| Extraction of waste synthetic resin into raw material               | 119, 285, 286                 | Synthetic resin, waste collection transport and treatment (industrial), resource recycling service                                                                                                      | 6, 17        | Coal and Petroleum Products, Waste and Remediation Service                                                                 |
| Alternative fuel production using oil mist recovery and waste oil   | 110, 285, 286                 | Other petroleum refining product, waste collection transport and treatment (industrial), resource recycling service                                                                                     | 6, 17        | Coal and Petroleum Products, Waste and Remediation Service                                                                 |
| Fertilizer production using by-products of fish and meat processing | 123, 285, 286                 | Fertilizer and nitrogenous compound, waste collection transport and treatment (industrial), resource recycling service                                                                                  | 7, 17        | Chemical Products, Waste and Remediation Service                                                                           |
| Construction material production using slag and ash                 | 147, 150, 154, 285, 286       | Ceramics for construction, concrete manufacture, asphalt manufactures, Waste collection transport and treatment (industrial), resource recycling service                                                | 8, 17        | Non-metallic Mineral Products, Waste and Remediation Service                                                               |
| Recovery of valuable metals from process wastewater and sludge      | 169, 173, 283, 286            | Copper smelting, refining and alloy product, other non-ferrous metal smelting, refining and alloy product, waste water and night soil(Industrial), resource recycling service                           | 9, 17        | Primary Metal Products, Waste and Remediation Service                                                                      |
| Application and extraction of process sludge into raw material      | 91, 92, 131, 285, 286         | Other cardboard, other chemical products, waste collection transport and treatment (industrial), resource recycling service                                                                             | 5, 7, 17     | Wood and Paper Products, Printing, Chemical Products, Waste and Remediation Service                                        |
| Construction material production using inorganic sludge             | 147, 156, 285, 286            | Ceramics for construction, other nonmetallic mineral product, waste collection transport and treatment (industrial), resource recycling service                                                         | 8, 17        | Non-metallic Mineral Products, Waste and Remediation Service                                                               |

|                                                                                                 |                              |                                                                                                                                                                     |          |                                                                                         |
|-------------------------------------------------------------------------------------------------|------------------------------|---------------------------------------------------------------------------------------------------------------------------------------------------------------------|----------|-----------------------------------------------------------------------------------------|
| Recovery of valuable metals from waste metals                                                   | 173, 285, 286                | other non-ferrous metal smelting, refining and alloy product, Waste collection transport and treatment (industrial), resource recycling service                     | 9, 17    | Primary Metal Products, Waste and Remediation Service                                   |
| Industrial water production using sewage treatment plant effluent                               | 282, 283                     | Waste water and night soil (public, Industrial)                                                                                                                     | 17       | Waste and Remediation Service                                                           |
| Recycling technology for ferrous metal scrap                                                    | 157, 159, 285, 286           | Pig iron, crude steel, waste collection transport and treatment (industrial), resource recycling service                                                            | 9, 17    | Primary Metal Products, Waste and Remediation Service                                   |
| Technology of bio-energy production using organic wastewater and by-products                    | 29, 286                      | LNG, resource recycling service                                                                                                                                     | 2, 17    | Mined and Quarried Products, Waste and Remediation Service                              |
| Extraction of waste synthetic rubber into raw material                                          | 120, 132, 137, 139, 285, 286 | Synthetic rubber, plastic primary products, tire and tube, other rubber products, waste collection transport and treatment (industrial), resource recycling service | 7, 17    | Chemical Products, Waste and Remediation Service                                        |
| Recycling technology for organic by-product in ceramic industry                                 | 143, 151, 285, 286           | Other glass product, lime and plaster products, waste collection transport and treatment (industrial), resource recycling service                                   | 8, 17    | Non-metallic Mineral Products, Waste and Remediation Service                            |
| Production of Industrial gas using by-product gas                                               | 116                          | Industrial gas                                                                                                                                                      | 7        | Chemical Products                                                                       |
| Application and extraction of process sludge into raw material (Silicon recovery in wastewater) | 131, 285, 286                | Other chemical product, waste collection transport and treatment (industrial), resource recycling service                                                           | 7, 17    | Chemical Products, Waste and Remediation Service                                        |
| Solid refuse fuel technology using sludge                                                       | 27, 106, 285, 286            | Bituminous coal, diesel oil, waste collection transport and treatment (industrial), resource recycling service                                                      | 2, 6, 17 | Mined and Quarried Products, Coal and Petroleum Products, Waste and Remediation Service |
| Recovery of organic solvent and reclaimed oil from wastewater and sludge                        | 109, 110, 112, 285, 286      | Lubricant and grease, other petroleum refining product, waste collection transport and treatment (industrial), resource recycling service                           | 6, 17    | Coal and Petroleum Products, Waste and Remediation Service                              |
| Production of the chemical raw materials using by-product gas                                   | 131, 286                     | Other chemicals, resource recycling service                                                                                                                         | 7, 17    | Chemical Products, Waste and Remediation Service                                        |
| Manufacturing of refractory materials using silicon sludge                                      | 156, 285, 286                | Other nonmetallic mineral product, waste collection transport and treatment (industrial), resource recycling service                                                | 8, 17    | Non-metallic Mineral Products, Waste and Remediation Service                            |
| Regeneration technology of waste adsorbent                                                      | 131, 285, 286                | Other chemical product, waste collection transport and treatment (industrial), resource recycling service                                                           | 7, 17    | Chemical Products, Waste and Remediation Service                                        |
| Production of microbial preparation using by-products, such as food processes and probiotics    | 55                           | feed                                                                                                                                                                | 3        | Food and Beverages Products                                                             |
| Fertilizer production using waste refractory materials                                          | 123, 285, 286                | Fertilizer and nitrogenous compound, Waste collection transport and treatment (industrial), resource recycling service                                              | 7, 17    | Chemical Products, Waste and Remediation Service                                        |
| Recovery of valuable metals in waste oil                                                        | 173, 285, 286                | other non-ferrous metal smelting, refining and alloy product, waste water and night soil(Industrial), resource recycling service                                    | 9, 17    | Primary Metal Products, Waste and Remediation Service                                   |
| Production of adsorbent using sludge                                                            | 131                          |                                                                                                                                                                     | 7        | Chemical Products                                                                       |
| Fertilizer production using organic sludge                                                      | 123, 285, 286                | Fertilizer and nitrogenous compound, waste collection transport and treatment (industrial), resource recycling service                                              | 7, 17    | Chemical Products, Waste and Remediation Service                                        |

|                                                                    |                               |                                                                                                                                                              |             |                                                                                                                            |
|--------------------------------------------------------------------|-------------------------------|--------------------------------------------------------------------------------------------------------------------------------------------------------------|-------------|----------------------------------------------------------------------------------------------------------------------------|
| Fuel production using waste wood                                   | 27, 29, 85, 88, 106, 285, 286 | Bituminous coal, LNG, recycling lumber, other wooden products, diesel oil, waste collection transport and treatment (industrial), resource recycling service | 2, 5, 6, 17 | Mined and Quarried Products, Wood and Paper Products, Printing, Coal and Petroleum Products, Waste and Remediation Service |
| Production of reducing agents for steel making using coke particle | 117, 285, 286                 | other inorganic compounds, waste collection transport and treatment (industrial), resource recycling service                                                 | 7, 17       | Chemical Products, Waste and Remediation Service                                                                           |
| Application and extraction of ash into rubber product filler       | 120, 285, 286                 | synthetic rubber, waste collection transport and treatment (industrial), resource recycling service                                                          | 7, 17       | Chemical Products, Waste and Remediation Service                                                                           |
| Application and extraction of process sludge into floor filler     | 85, 88, 285, 286              | recycling lumber, other wooden products, waste collection transport and treatment (industrial), resource recycling service                                   | 5, 17       | Wood and Paper Products, Printing, Waste and Remediation Service                                                           |
| Construction material production using inorganic by-product        | 156, 285, 286                 | other nonmetallic mineral product, waste collection transport and treatment (industrial), resource recycling service                                         | 8, 17       | Non-metallic Mineral Products, Waste and Remediation Service                                                               |
| Hydrotalcite production using fly ash                              | 131, 285, 286                 | Other chemical product, waste collection transport and treatment (industrial), resource recycling service                                                    | 7, 17       | Chemical Products, Waste and Remediation Service                                                                           |

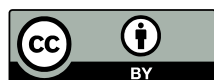

© 2018 by the authors. Licensee MDPI, Basel, Switzerland. This article is an open access article distributed under the terms and conditions of the Creative Commons Attribution (CC BY) license (<http://creativecommons.org/licenses/by/4.0/>).
